# Supplementary material for: A high-temperature mixed potential CO gas sensor for in situ combustion control
Source: Royal Society of Chemistry journal article supplement (doi:10.1039/d0ta06320g), 2020-01-01
Supplement: d0ta06320g1.pdf [file d0ta06320g1.pdf]

## Supplemental information

### High-temperature mixed potential CO gas sensor for in-situ combustion control

Yi Wang,<sup>‡a</sup> Liang Ma,<sup>‡a,b</sup> Wenyuan Li,<sup>a</sup> Wei Li<sup>a</sup> and Xingbo Liu<sup>\*a</sup>

- a. Mechanical & Aerospace Engineering Department, Benjamin M. Statler College of Engineering & Mineral Resources, West Virginia University, Morgantown, WV 26506, USA.
- b. School of Materials Science and Engineering, Hebei University of Engineering, Handan 056038, China

\* Corresponding author: E-mail: Xingbo.liu@mail.wvu.edu

‡ These authors contributed equally to this work.

## 1. Supplementary figures and related discussion

Because the size of the as-fabricated NiO sensor is much bigger than the BET sample holder tube, BET cannot be conducted on the sensor as a whole. In addition, the total surface area of the NiO electrode of a single sample is too small to get a valid BET test. Therefore, a scaled-down sample won't work as well. To measure BET, we have to scratch off the NiO electrode from the YSZ substrate, and collect the NiO electrode materials for testing. It is not as good as an in-device measurement, but we believe will still reveal information of the porosity to a large extent. As shown in **Fig. S1(a)** and **(c)**, we fabricated the porous and dense NiO sensor samples via the same preparation procedure in the manuscript. Then, we scratched the NiO electrode from the as-prepared sensor, as seen in **Fig. S1(b)** and **(d)**. Thus, we can obtain ~3 mg NiO powder per porous NiO sensor and ~6 mg NiO pellets per dense NiO sensor. Because the surface area of NiO from one sample is much lower than the threshold of a good BET characterization, we made 80 samples for porous NiO sensor and 75 samples for dense NiO sample, leading to 227 mg NiO powder and 441 mg small NiO pellets for their BET measurements.

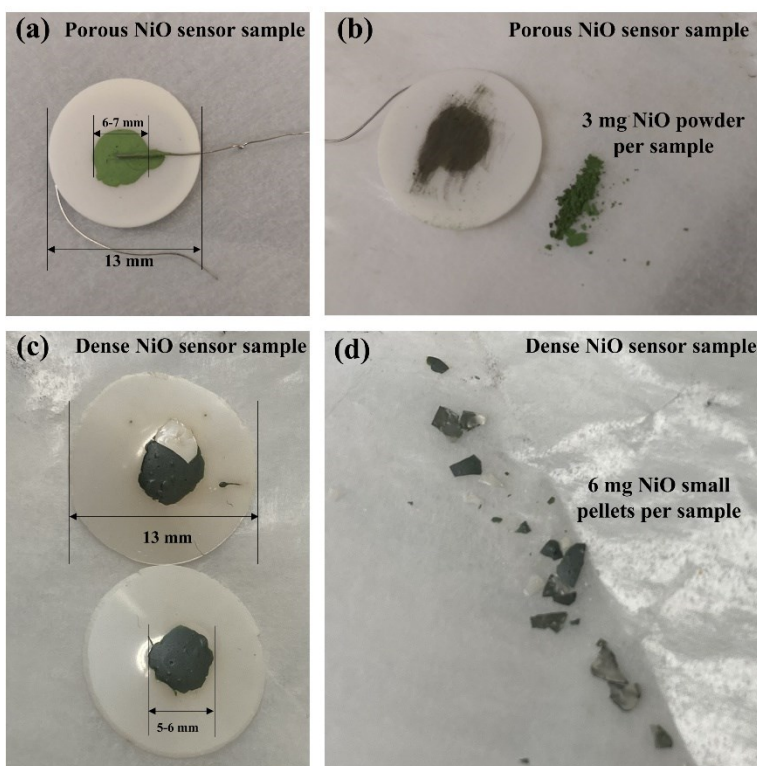

**Fig. S1** Porous and dense NiO BET samples preparation procedure

**Fig.S2 (a) - (d)** show the BET data for porous and dense NiO electrodes. The surface area of porous NiO is calculated as 1.33 m<sup>2</sup>/g, as shown in **Fig. S(a) and 2(b)** and the pore size distribution is shown in **Fig. S2(d)** which indicates a large pore size of NiO. However, for the dense NiO, the adsorbed amount is a

negative number with the increase of pressure, which is not possible. This means that the surface area is too small to be well measured by the BET instrument. Therefore, we decided not to add these results to the manuscript.

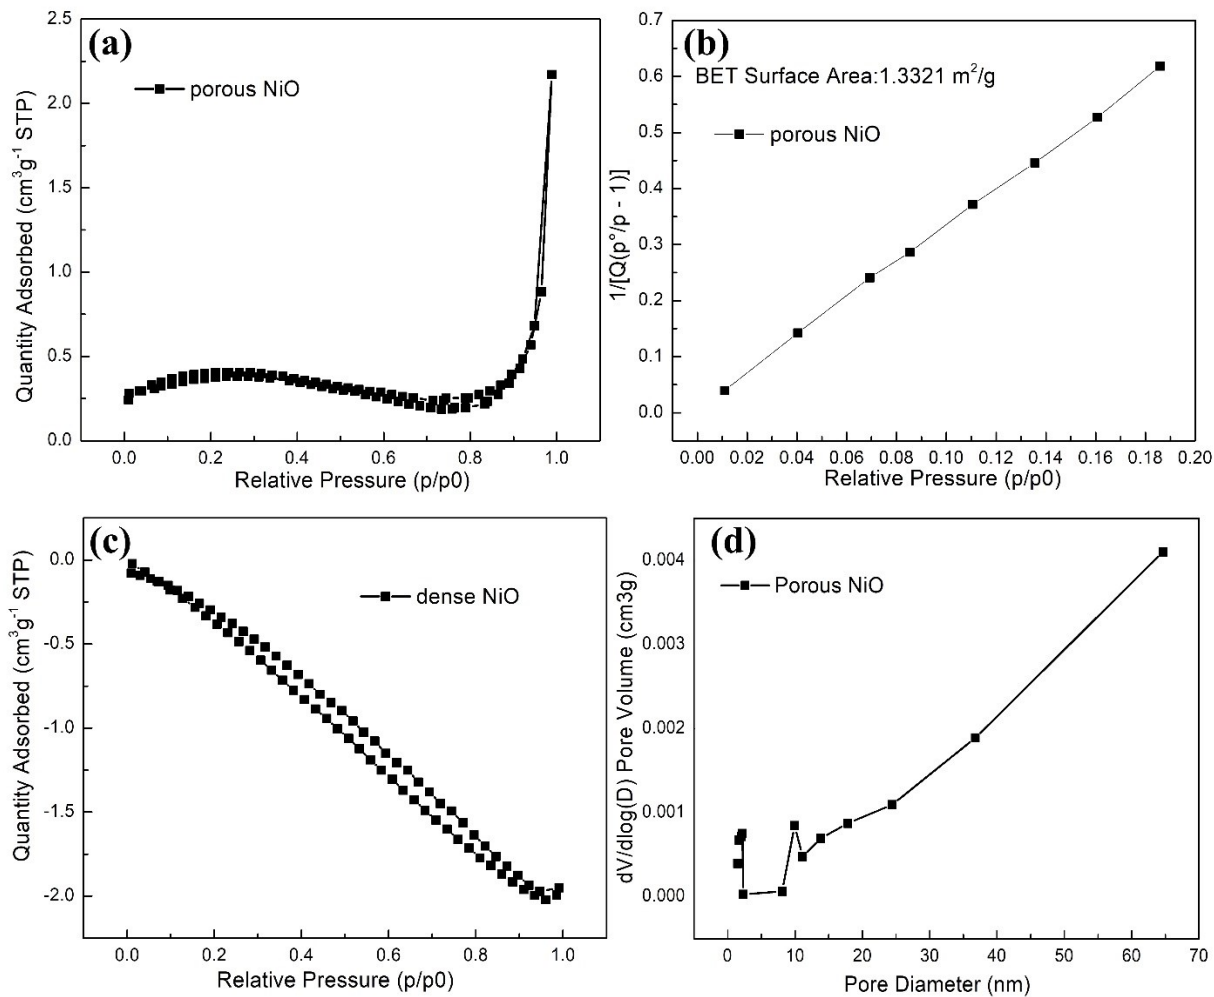

**Fig. S2** (a) Isotherm plot for porous NiO (b) BET surface area plot for porous NiO (c) Isotherm plot for dense NiO (d) The pore size distribution of porous NiO

## 2. Supplementary tables

Table 1 Detailed composition of gas used in this work (manufactured and graded by Matheson Gas Inc)

| Gas                              | compositions                                                               |                       |                      |                        |             |
|----------------------------------|----------------------------------------------------------------------------|-----------------------|----------------------|------------------------|-------------|
| 2000 ppm CO bal. N <sub>2</sub>  | Mixed <b>Research grade CO</b> with <b>ultra high purity N<sub>2</sub></b> |                       |                      |                        |             |
| Research grade CO                | 99.998% CO                                                                 | <3ppm CO <sub>2</sub> | <1ppm H <sub>2</sub> | <0.5ppm O <sub>2</sub> | <1ppm water |
| ultra high purity N <sub>2</sub> | 99.999% N <sub>2</sub>                                                     | <1ppm CO              | <1ppmCO <sub>2</sub> | <2ppm O <sub>2</sub>   | <3ppm water |

Table 2 Comparison of responses to ppm CO in various atmosphere and temperature

| Sensing Materials/electrodes     | Sensing temperature (°C) | CO conc. (ppm) | Oxygen conc. (%) | Response  (mV) | Reference |
|----------------------------------|--------------------------|----------------|------------------|----------------|-----------|
| NiO                              | 1000                     | 1000           | 3                | 36             | This work |
| Nano ZnO                         | 700                      | 400            | 15               | 50             | 1         |
| Cr-Fe based spinel Oxides        | 450                      | 100            | 21               | 87             | 2         |
| Zn-Sn-O oxide                    | 600                      | 1140           | 20               | 90             | 3         |
| NiFe <sub>2</sub> O <sub>4</sub> | 350                      | 1000           | -                | 99             | 4         |
| Tin-doped Indium oxide           | 613                      | 510            | Air              | 72             | 5         |
| Layered Au-Pt YSZ                | 600                      | 1000           | 5                | 80             | 6         |
| Rh-YSZ                           | 700                      | 400            | 5                | 65             | 7         |

1. K. Mahendraprabhu, A. Selva Sharma and P. Elumalai, *Sensors and Actuators B: Chemical*, 2019, **283**, 842-847.
2. S. A. Anggraini, Y. Fujio, H. Ikeda and N. Miura, *Analytica Chimica Acta*, 2017, **982**, 176-184.
3. F. Sun, X. Li, L. Liu and J. Wang, *Sensors and Actuators B: Chemical*, 2013, **184**, 220-227.
4. X. S. Liang, S. Q. Yang, T. G. Zhong, Q. Diao, H. Zhang, J. G. Li, B. F. Quan and G. Y. Lu, *Sens. Lett.*, 2011, **9**, 832-836.
5. X. Li, W. Xiong and G. M. Kale, *Electrochemical and Solid-State Letters*, 2005, **8**, H27.
6. X. Zhang, H. Kohler, M. Schwotzer, Y. H. Wu and U. Guth, *Sensors and Actuators B: Chemical*, 2019, **278**, 117-125.
7. V. V. Plashnitsa, S. A. Anggraini and N. Miura, *Electrochemistry Communications*, 2011, **13**, 444-446.

### Reference
